1 **Antibody mediated epitope mimicry in the pathogenesis of Zika virus related**  
2 **disease.**

3  
4 E. Jane Homan<sup>1\*</sup>, Robert W. Malone<sup>2,3</sup>, Steven J. Darnell<sup>4</sup>, Robert D Bremel<sup>1</sup>

5  
6 **Affiliations:**

7 <sup>1</sup>ioGenetics LLC, Madison, WI.

8 <sup>2</sup>RWMaloneMD LLC, Scottsville, VA.

9 <sup>3</sup>Class of 2016, Harvard Medical School Global Clinical Scholars Research Training Program,  
10 Boston, MA.

11 <sup>4</sup>DNASTAR, Inc., Madison, WI.

12 \*Corresponding author

13 Email jane\_homan@iogenetics.com  
14

15 **Abstract**

16 The association of Guillain-Barré syndrome with Zika virus infection raises suspicion of  
17 autoimmunity in the pathogenesis of Zika associated disease. Using computational analysis to  
18 identify predicted B and T cell epitopes, we assessed whether antibodies elicited by B cell  
19 epitopes in Zika virus may also target B cell epitopes in the human proteome. We detected amino  
20 acid motifs predicted to be B cell epitopes in Zika virus proteins which are also present in human  
21 proteins, including pro-neuropeptide Y (proNPY), NAV2 and other proteins with interacting  
22 neurophysiologic function. We examine the predicted MHC binding of peptides likely to provide  
23 T cell help to the potential mimic epitopes. Some potential mimic epitopes in Zika virus  
24 envelope have apparently strong T cell help, likely facilitating immunoglobulin class switch. We  
25 also identify epitope mimic commonalities with dengue serotypes 1 and 3. We hypothesize that  
26 antibodies to Zika virus epitopes may contribute to the pathogenesis of Zika-associated Guillain-  
27 Barré syndrome, microcephaly, and ocular lesions, and may be a driver of autoimmunity. The

28 risk associated with responses to potential epitope mimics must be addressed in the development  
29 of vaccines and therapeutics for Zika virus infections.

## 30 **Author Summary**

31 Using computational immunologic analysis, we examine the possibility that anti-Zika antibodies  
32 are binding to mimic epitopes on human proteins and that this autoimmunity may be a driver for  
33 some of the clinical signs associated with Zika virus infection. These include Guillain Barré  
34 Syndrome, other neurophysiologic deficits, and the Zika Fetal Syndrome, including  
35 microcephaly. We identify specific proteins and epitopes to which anti-Zika antibodies may  
36 bind. The prospect that the pathogenesis of ZIKV may involve an antibody-mediated  
37 autoimmune component must be addressed in vaccine and therapeutic development.

## 38 **Introduction**

39 Zika virus (ZIKV) has emerged as a rapidly spreading epidemic throughout the tropical  
40 Americas. Known to cause mild febrile disease since its discovery in Uganda almost 70 years  
41 ago [1], changes in the clinical signs of Zika were noted following its appearance in French  
42 Polynesia, and arrival in Latin America. Here, infection may be followed by Guillain-Barré  
43 Syndrome (GBS)[2] and adult infection is also associated with other sensory neurologic  
44 impairment [3]. Spontaneous abortion and primary microcephaly, following infection during the  
45 first 2 trimesters of pregnancy, is increasingly regarded as caused by ZIKV infection[4, 5].  
46 Ocular lesions have been noted in surviving infants [6, 7]. These and other neonatal neurologic  
47 sequelae of infection during pregnancy constitute Zika fetal syndrome. GBS has been reported  
48 sporadically following dengue infection [8, 9], but is reportedly more severe in Zika case [10].  
49 The incidence of teratogenic lesions sets Zika apart from dengue. ZIKV has been detected by  
50 PCR in fetuses, and high concentrations of Zika virion particles have been detected by electron  
51 microscopy in the fetal central nervous system [4]. The combination of GBS and Zika fetal  
52 syndrome associated with infection suggest that these disease syndromes may share common  
53 etiology such as an autoimmune response targeting neurologic functions, and raises the  
54 possibility of epitope mimicry [11].

55 Seeking to illuminate Zika pathogenesis, in the studies described herein we have focused on  
56 potential autoimmune pathways rather than considering the virus as the only agonist of

57 pathology. We have utilized an applied mathematical approach to evaluate predicted immune  
58 responses to Zika. We compare the profile of predicted antibody mediated epitope mimicry of  
59 ZIKV in the Americas with that of Old World ZIKV. We have predicted proteins in the human  
60 proteome, with functions in neurophysiology and fetal development, and which may be  
61 functionally compromised by binding to anti-Zika antibodies.

## 62 **Methods**

### 63 *Virus sequences*

64 Polyprotein sequences were downloaded from Genbank and manually curated into gene product  
65 proteins based on GenPept annotations. To assess how the pathogenesis of ZIKV related disease  
66 changed between Africa and the Americas, our effort focused initially on comparing two  
67 representative isolates: Brazilian isolate SPH2015 (gi: 969945757, “Zika Brazil”) [12] and a  
68 ZIKV isolate representative of the West African clade (gi: 592746966 “Zika Africa”) [13].  
69 Subsequent analyses were conducted on other ZIKV isolates, and on related flaviviruses,  
70 including recent South American isolates and reference strains of dengue, yellow fever, and  
71 representative neurotropic flaviviruses. Flaviviruses analyzed are listed in Supporting Table 1.

72 Given the co-endemicity of chikungunya virus, and because of similarity of the microcephalic  
73 lesions linked to Zika to those following intrauterine exposure to cytomegalovirus (CMV) and  
74 rubella, we also performed a preliminary analysis of structural proteins of a small number of  
75 these viruses. Sequences for chikungunya and rubella were accessed from NIAID Virus  
76 Pathogen Database and Analysis Resource (ViPR) [14], using 10 geographically distinct but  
77 random wild type isolates of each. In addition, a complete proteome of CMV Towne was  
78 analyzed (FJ616285).

### 79 *Proteome*

80 The human proteome dataset was downloaded from the UniProt repository (Nov 2013) [15]. It  
81 was manually curated to remove sequences derived from antibody V-regions. UniProt  
82 continually re-curates and updates the repository, but changes in the database since downloading  
83 are inconsequential for the use described herein. As curated in our laboratory, the dataset  
84 represents slightly greater than four-fold redundancy and contains a total of 88,145 identified  
85 proteins comprising  $3.498 \times 10^7$  peptides.

## 86 ***Epitope analysis***

87 Binding of viral peptides to B and T cells is a competitive process. To assess binding in the  
88 competitive context of each protein, the polyprotein of each flavivirus was broken out into  
89 individual proteins based on GenPept annotations to allow standardization of competitive  
90 binding. Arrays of predicted major histocompatibility complex (MHC) binding, as well as of  
91 linear B cell epitope probability were constructed for each sequential peptide in each of the  
92 proteins. The applied mathematical tools used for the immunoinformatic analysis have been  
93 previously described [16, 17]. Briefly, ensembles of neural network (NN) prediction equations  
94 were developed using publically available databases of MHC class I and class II binding data  
95 [18, 19] using the neural platform of the JMP® (SAS Institute, Cary, NC) statistical software  
96 application. As initially described by Wold *et al* [20], for multiple regression predictions the first  
97 three principal components of amino acid physical properties were used as predictors in the input  
98 layer of the neural networks. Ten ensembles are used for each allelic prediction. The use of  
99 ensembles enables estimation of the mean binding affinity and an estimate of the variation in the  
100 NN binding affinity prediction. All binding data generated by the NN were transformed to a  
101 within-protein zero mean unit variance distribution using a Johnson Sb distribution algorithm in  
102 JMP®. This transformation puts all binding data on a common scale, making it possible to use  
103 the principle of additivity of variance.

## 104 ***B cell epitope prediction***

105 Viral proteins were analyzed to compute predicted probability of B cell epitopes (BEPIs),  
106 standardized within protein. We had precomputed the proteome database to determine peptides  
107 that fulfil the criteria of a potential BEPI within each source protein. We use a sliding 9-mer  
108 window to compute predicted BEPIs, and for comparative purposes, the pentamer central core of  
109 each predicted BEPIs was used to seek matches. A pentamer is chosen because, not only does it  
110 provide a very stringent filter, but it corresponds to the area needed to engage the paratope of an  
111 antibody [21]. A series of filters was applied to (a) find ZIKV protein pentamers with the highest  
112 probability of functioning as BEPIs, this was initially set at the top 25%, and (b) identify  
113 pentamers with the highest probability of being BEPIs in each of the >88,000 human proteins,  
114 initially set at the top 40%. Matching BEPI pentamers were identified, then a third filter applied  
115 (c) a search term of key words to extract human proteome proteins with neurologic functions. In

116 this case we utilized keywords comprising 56 variations on the terms “neur”, “glial”, “myelin”,  
117 “opt”, and “synapt” (Supporting Table S2).

118 Pentamers fulfilling all of these three criteria were declared to be potential Zika-proteome  
119 epitope mimics. The stringency of these criteria can then be increased to identify the highest  
120 probability mimics. This process provides a highly selective set of filters. Any single pentamer  
121 has a 1 in  $20^5$  chance of occurrence (5 of 20 amino acids). When this probability is applied  
122 independently to both the constituents of the Zika polyprotein and to the human proteome sets,  
123 there is a  $3423/20^5 \times 20^5$  chance of a match, or 1 in  $3.3 \times 10^{10}$ . This probability is further reduced by  
124 application of the BEPI and keyword filters. However, the occurrence of multiple isoforms of  
125 some proteins increases probability. In a further independent evaluation of the ZIKV proteins,  
126 the adjacency to probable BEPIs of 15-mers with predicted high affinity MHC II binding was  
127 determined, as these may stimulate specific T cell help. T cell help may stimulate a higher titer  
128 of antibody, and will enable class switch to IgG.

129 The characteristics and performance of our B cell epitope (BEPI) prediction tools have likewise  
130 been described elsewhere [22]. Briefly, like the MHC predictions, the BEPI prediction tools  
131 comprise NN and use amino acid physical property principal components, and are aligned to the  
132 BEPIPred [23] approach, and developed to work within our data processing workflow. The  
133 essential prediction is a probability that the central amino acid in a nonamer peptide resides  
134 within a combinatorial “patch” of amino acids that might be a BEPI. The probability is  
135 transformed to a within-protein zero mean unit variance distribution using a Johnson Sb  
136 distribution. This process puts the metrics onto a common scale making it possible to use the  
137 scaled metric as a statistical screening criterion that can be used on groups of proteins. For  
138 convenience of comparison to standardized MHC binding where negative standardized scores  
139 represent high affinity binding, the standardized BEPI probabilities are inverted (multiplied by -  
140 1).

141 Whereas MHC binding predictions lead to a specific binding affinity prediction for a particular  
142 peptide, this cannot be done in the case of a B cell somatic hypermutational response in a  
143 germinal center response to infection. The B cells will generate an enormous number of different  
144 antibody molecules with differing affinities targeting the same “patch” of amino acids.  
145 Moreover, as has been shown for the B cell repertoire responders to tetanus toxoid the population

146 of B cells surviving in the steady state may represent a small fraction of the early responding  
147 population [24]. We have restricted the primary screen to the central pentamer of the nonamer in  
148 the NN. A central pentamer can be found in different molecular contexts with different predicted  
149 propensities for B cell interactions. Such a central pentamer can be found in  $20^4$  different  
150 flanking tetramer contexts with different predicted propensities for B cell interactions. The  
151 Pearson correlation ( $r = 0.44$ ,  $P < 0.0001$ ) measures the magnitude of the effect of the flanking  
152 tetramers on overall BEPI probability (Supporting Figure S1).

153 During the analysis it became apparent that ZIKV pentamers with high BEPI probability were  
154 also generating very high probability matches to von Willebrand's factor A (VWA). Because this  
155 factor could be implicated in the clinical signs (hemorrhagic microvascular rash), this group of  
156 pentamers was added to the subset for further analysis.

157 Thus, we predicted ZIKV BEPIs likely to give rise to anti-Zika antibodies, and to also  
158 specifically react with BEPIs in target human proteins of neurologic or other selected functions.  
159 This process was repeated with other ZIKV isolates, and the other selected flaviviruses. The  
160 predicted Zika-proteome mimics identified by the screening process were evaluated to address  
161 the following questions: How do epitope mimics in Zika Brazil differ from those predicted in  
162 Zika Africa? Are potential mimics unique to Zika versus other flaviviruses? Do other  
163 flaviviruses have mimics in the same human proteins? What fraction of the MHC alleles are  
164 likely to provide help in generating antibodies targeting these mimics?

### 165 ***Structural Analysis***

166 Envelope (E) protein structure models were predicted using NovaFold<sup>®</sup> (DNASTAR, Inc.,  
167 version 13.0, structure template library 2015-W47-5). NovaFold<sup>®</sup>, which is based on the I-  
168 TASSER structure prediction algorithm [25-27], selects a collection of potential structure  
169 templates using protein threading alignments, then perturbs the selected templates into lower-  
170 energy conformations using replica exchange simulations, and finally relaxes the backbone and  
171 side chains of the final models using all-atom energetic refinement. The E protein ectodomain  
172 sequences for Zika Brazil (GenBank: ALU33341.1) and Zika Africa (GenBank: AHL43504.1)  
173 strains were obtained from the Zika virus polyprotein (residues 291-690). The top templates  
174 included E protein structures from West Nile (PDB ID: 2I69) and Tick-borne encephalitis  
175 viruses (PDB ID: 1SVB). Accuracy is estimated in terms of predicted Template Model score

176 (TM-score; a metric weighing close atom pairs between structures greater than more distant atom  
177 pairs; closer to 1 is better, greater than 0.5 indicates a correct fold) [28, 29]. TM-score has been  
178 proven to be a more robust metric than root mean square deviation (RMSD) as it is less sensitive  
179 to local structural variations [30]. For the Brazil model, the predicted TM-score was 0.85; for the  
180 Africa model, it was 0.87. Both scores are indicative of a high degree of confidence in the  
181 accuracy of the predicted structures.

182 Surface patches of the Zika virion were modeled by aligning individual copies of the predicted E  
183 protein models onto the cryo-electron microscopy structure of the dengue serotype 1 virus (PDB  
184 ID: 4CCT, resolution 4.5 Å). The modeled virion patch consists of the following dengue E  
185 proteins from the biological assembly: chains A, B, and C from model 1; chains A and C from  
186 model 6; and chain B from model 10. Pairwise structure alignments were performed using TM-  
187 align [31] in Protean 3D™ (DNASTAR, Inc., version 13.0). Compared to the dengue E protein  
188 structure, the TM-score was 0.77 for the Zika Brazil E protein model and 0.74 for the Africa  
189 model. Solvent-accessible surfaces for the collective patch of six E proteins were calculated  
190 using EDTsurf [32] in Protean 3D™.

## 191 **Results**

### 192 *Envelope protein epitopes*

193 As the structural proteins are exposed to the immune system and account for nearly all of the  
194 antibodies elicited by comparable flaviviruses, we first examined the structural proteins, with  
195 emphasis on the envelope protein [33, 34]. Despite substantial sequence differences in the  
196 envelope proteins among the different viruses, there is a strong similarity in the molecular  
197 location of predicted linear B cell epitopes (Figure 1). Our *in silico* predictions of dengue linear  
198 B cell epitopes are consistent with those mapped by monoclonal antibodies [35, 36]. Epitopes in  
199 envelope domain II (EDII), conserved across other flaviviruses and thought to contribute to  
200 antibody dependent enhancement (ADE) [37], are also preserved in Zika virus. A band of  
201 predicted high affinity MHC binding, located at amino acid positions 194-224 (Figure 1), is  
202 observed in all flavivirus envelopes examined. However, there is more difference in distribution  
203 of other peptides with predicted high affinity MHC class I and II binding between the analyzed  
204 flaviviruses. Of note in ZIKV is a region at amino acid positions 369-390, adjacent to the DE  
205 loop of envelope domain III (EDIII), with high predicted MHC II binding across all HLA alleles.

206 Overall, the concordance between our *in silico* predictions and traditional experimental epitope  
207 mapping in flaviviruses lends support to the approaches described below, and is consistent with  
208 prior reports [22]. We also noted (data not shown) that compared to other viruses of similar size,  
209 ZIKV has an overall very high degree of peptide motif match to the human proteome.

210 Figure 1: Comparative linear immunome of the envelope proteins of Zika Brazil and dengue 3.  
211 A. Zika Brazilian isolate SPH2015 (gi: 969945757); B. Dengue 3, a 2009 Brazilian isolate  
212 D3BR/AL95/2009 gi: 389565793. X axis shows N>C amino acid positions. Y Axis shows  
213 standard deviation units of predicted MHC binding. Background shading shows transmembrane  
214 domains (green) outside envelope (yellow), intraenvelope (pink). Predicted MHC-I (red line),  
215 MHC-II (blue line) binding, and probability of B cell binding (orange lines) for each peptide,  
216 arrayed N-C, for a permuted population comprising 63 HLAs. Ribbons (Red=MHC-I, Blue-  
217 MHC-II) indicate the top 25% affinity binding. Orange bars indicate high probability B-cell  
218 binding. Arrow indicates band of predicted MHC II binding in the Domain 3 DE loop of Zika  
219 envelope.

### 220 ***Predicted epitope mimics in Zika Brazil vs Zika Africa***

221 Conformational B cell epitopes undoubtedly play an important role in ZIKV immunology, and  
222 may cross link molecules and domains of the envelope protein, as with dengue [34]. However,  
223 the simplest form of molecular mimicry would be an exact match of a group of amino acids  
224 similarly exposed as a linear B cell epitope in both a viral and a human protein. In such cases,  
225 viral infection may stimulate antibodies that also bind B cell epitopes in the human proteome.  
226 Collectively, all ZIKV proteins in the two isolates examined comprise 103 pentamers meeting  
227 the criteria of predicted Zika-proteome epitope mimics laid out above. Of these, 88 were  
228 conserved between Zika Africa and Zika Brazil, 15 distinct new ones were gained in Zika Brazil,  
229 and 13 present in Zika Africa were lost before arrival in Brazil. Table 1 summarizes those in the  
230 three structural proteins. Mimic matches for all proteins are listed in Supporting Table S3. Figure  
231 2 shows five potential mimics stand out as having the highest probability of generating a high  
232 antibody titer.

233 Figure 2: Categorization of potential mimic pentamers in the envelope proteins of Zika virus

234 Pentamers occurring in envelopes of the two Zika isolates examined are listed on the Y axis and  
235 grouped by human proteome neurologic protein match. X axis shows the probability of a  
236 pentamer being a B cell epitope (BEPI) in negative standard deviation units. Panel A shows  
237 predicted BEPIs in the virus envelope. The red dotted line identifies the top 25%; black line the  
238 top 10% cutoff; Panel B shows predicted BEPIs in the human proteome neurologic proteins, with  
239 the red dotted line indicating the top 40%. Round markers are motifs conserved in Zika Brazil  
240 and Zika Africa; triangular markers are in Zika Brazil only; bars identify motifs only in Zika  
241 Africa. Dark blue and red markers identify motifs meeting all selection criteria; pale green and  
242 lilac markers fail on one or more criteria of selection.



243

244 Table 1: Pentamer predicted B cell epitope mimics in the structural proteins of Zika Brazil and  
245 Zika Africa.

| Pentamer     | Zika AFR | Zika BR | BEPI Virus | BEPI Proteome | UniProt ID | Annotation                                                           |
|--------------|----------|---------|------------|---------------|------------|----------------------------------------------------------------------|
| Envelope     |          |         |            |               |            |                                                                      |
| <b>PRAEA</b> | Y        | Y       | -1.67      | -0.84         | OPTN       | Optineurin                                                           |
| <b>TESTE</b> | Y        | Y       | -1.59      | -1.07         | F8WCE4     | Synaptogyrin-1                                                       |
| <b>GADTG</b> | Y        | Y       | -1.51      | -2.32         | VWA8       | von Willebrand factor A                                              |
| <b>ESTEN</b> | Y        | Y       | -1.50      | -0.55         | NPY        | Pro-neuropeptide Y                                                   |
| <b>KGRLS</b> | N        | Y       | -1.46      | -0.80         | NAV2       | Neuron navigator 2                                                   |
| STENS        | Y        | Y       | -1.29      | -1.22         | E7EP46     | Neurotrophin-4                                                       |
| AGADT        | Y        | Y       | -1.18      | -1.16         | NOTC3      | Neurogenic locus notch homolog protein 3                             |
| TENSK        | Y        | Y       | -1.06      | -0.63         | VWA3A      | von Willebrand factor A                                              |
| QPENL        | Y        | Y       | -0.95      | -1.32         | NOTC2      | Neurogenic locus notch homolog protein 2                             |
| LSSGH        | N        | Y       | -0.84      | -0.38         | NDF4       | Neurogenic differentiation factor 4                                  |
| PVITE        | Y        | Y       | -0.76      | -0.41         | E9PHJ4     | Neural cell adhesion molecule L1                                     |
| GGALN        | N        | Y       | -0.74      | -0.37         | NOTC1      | Neurogenic locus notch homolog protein 1                             |
| AKVEV        | Y        | N       | -0.73      | -0.46         | HRSL4      | Retinoic acid receptor responder protein 3                           |
| ATLGG        | Y        | Y       | -0.70      | -1.13         | BRNP2      | BMP_retinoic acid-inducible neural-specific protein 2                |
| MSGGT        | Y        | Y       | -0.66      | -0.52         | BDNF       | Brain-derived neurotrophic factor                                    |
| PrM          |          |         |            |               |            |                                                                      |
| ARRSR        | Y        | Y       | -1.65      | -0.95         | NEUL2      | Neuralized-like protein 2                                            |
| SDAGK        | Y        | N       | -1.46      | -1.55         | E7EUC6     | Neuron navigator 3                                                   |
| GSSTS        | Y        | Y       | -1.27      | -1.95         | SYPL2      | Synaptophysin-like protein 2                                         |
| STRKL        | Y        | Y       | -1.15      | -0.59         | A2A341     | Synaptonemal complex protein 2                                       |
| SHSTR        | Y        | Y       | -1.02      | -0.63         | F5GZS7     | Neuregulin-2                                                         |
| RSRRA        | Y        | Y       | -0.99      | -0.93         | ARHG8      | Neuroepithelial cell-transforming gene 1 protein                     |
| Capsid       |          |         |            |               |            |                                                                      |
| KKRRG        | N        | Y       | -2.21      | -1.69         | H7BY68     | Putative neuroblastoma breakpoint family member 8                    |
| RRGAD        | Y        | Y       | -2.11      | -0.75         | NEUL4      | Neuralized-like protein 4                                            |
| EKKRR        | N        | Y       | -2.05      | -1.55         | NPAS2      | Neuronal PAS domain-containing protein 2                             |
| ERKRR        | Y        | N       | -1.95      | -0.60         | NSMF       | NMDA receptor synaptonuclear signaling and neuronal migration factor |
| SVGKK        | Y        | Y       | -0.93      | -0.61         | ESYT3      | Extended synaptotagmin-3                                             |

246 Only pentamers meeting the criteria of predicted neurologic mimics are shown. Data for other  
247 pentamers and other Zika proteins are shown in Supporting Table S3. Predicted B cell epitope  
248 probability is shown in negative standard deviation units and pentamers are ranked from highest  
249 to lowest probability. Most pentamers map to multiple isoforms or UniProt entries for the same  
250 protein; a representative example is shown. An exception is NPY which is highly conserved and  
251 has a single UniProt entry. More detail and links to UniProt are in Supporting Table S3.

252

253 To examine the locations of the novel motifs identified by the predicted mimic pentamers, we  
254 constructed an atomic (3D) model of the Zika Brazil and Zika Africa envelope protein (E  
255 protein) using NovaFold<sup>®</sup> structure prediction software from DNASTAR, Inc. NovaFold<sup>®</sup> uses a

256 hybrid modeling approach that incorporates homologous structures and *ab initio* modeling to  
257 accurately predict a protein's 3D structure from its amino acid sequence. As seen in Figure 3, the  
258 pentamers contained within the Zika Brazil PVITESTENSK sequence are expected to reside on  
259 the solvent-accessible DE loop in EDIII[33]. These include predicted mimic matches for pro-  
260 neuropeptide Y (proNPY) (ESTEN), synaptogyrin (TESTE), neurotrophin 4 (STENS), neural  
261 cell adhesion molecule (PVITE), and VWA (TENSK). Adjacent to this is a sequence comprising  
262 overlapping 15-mer peptides that, in aggregate have predicted high affinity MHC II binding for  
263 almost all mapped DRB, DP and DQ alleles (Figure 4). Peptides from this region are thus likely  
264 to provide context-specific T cell help through co-presentation by B cells [38], supporting  
265 development of high antibody titer and class switching.

266 Figure 3: Model of the ectodomain for the Zika Brazil E protein predicted by NovaFold®  
267 (DNASTAR, Inc.). The E protein domains (ED) are colored in red-orange (I), yellow (II), and  
268 blue (III). Side chains are displayed for residues associated with the labeled epitopes. The arrow  
269 for the KGRLS epitope indicates the position of Ser 285.

270

271 Figure 4: Predicted MHC II binding affinity adjacent to ESTEN and KGRLS  
272 X axis (top) shows HLA II analyzed. Y axis shows 15-mer peptides across the sequences of  
273 interest adjacent to PVITESTENSK (A) and KGRLS (B). Cell coloration shows predicted  
274 binding affinity in standard deviation units. Dark green is highest affinity predicted binding,  
275 brown lowest.

276

277 A high probability of a mimic to optineurin occurs in EDI (PRAEA). Structurally adjacent to  
278 this, EDI also comprises two overlapping predicted pentamer mimic motifs, found in Zika Brazil  
279 but not Zika Africa, with matches to neural navigator 2 (NAV2) (KGRLS) and to neural  
280 development factor 4 (LSSGH). These predicted new mimics arise from a single SNP leading to  
281 the F285S mutation, first detected in SE Asian isolates .

282 To further investigate the KGRLS epitope, we constructed a model of the Zika Brazil and Africa  
283 E proteins in a mature virion configuration (Figure 5) using Protean 3D™ molecular modeling  
284 software from DNASTAR, Inc. Both Ser 285 (Brazil) and Phe 285 (Africa) are expected to be  
285 solvent-accessible, but also reside in a cleft formed at the interface between two E protein  
286 subunits. The F285S mutation suggests this cleft may be deeper and more polar in Zika Brazil,  
287 altering the BEPIs exposed at this location. The virion models also suggest that, given their  
288 relative spatial proximity, Thr 156 and Ser 285 in Brazil and Ile 156 and Phe 285 in Africa may

289 form conformational epitopes with differing geometric and chemical characteristics. A further  
290 predicted new mimic (GGALN), for neurogenic locus notch homolog protein 1 (NOTCH1), occurs  
291 close to the C terminus of the soluble portion of the envelope, but is detected only at a low  
292 stringency BEPI probability selection.

293 Figure 5: Model of a virion surface patch consisting of E proteins for Zika Brazil (A) and Zika  
294 Africa (B) variants. Predicted monomer models are structurally aligned to the biological assembly  
295 of the dengue serotype 1 virus structure (PDB ID: 4CCT) in Protean 3D™ (DNASTAR, Inc.).  
296 The solvent-accessible surface is colored to distinguish the location of the individual E proteins.  
297 Labeled residues on the central green subunit denote nonsynonymous variations between Zika  
298 Brazil and Zika Africa. Additionally, the surface is colored bright pink for region associated with  
299 position 285 (part of the KGRLS epitope) and light green for the remaining residues. Positions  
300 156 and 285 are colored in the other subunits to establish the orientation relative to the central  
301 subunit. Notably, Ser 285 (A) is predicted to be solvent exposed, but residing in a cleft formed  
302 between two subunits.

303

#### 304 *Epitope mimics in other flavivirus envelope proteins*

305 We compared epitopes of ZIKV and other flaviviruses, using an approach designed to identify  
306 complex sharing patterns, to assess the differences in antibody mimics that each may generate.  
307 Despite the taxonomic similarity there are few predicted mimics in common between ZIKV and  
308 the other flaviviruses investigated. Only two of the pentamer predicted Zika mimics were found  
309 to be identical to mimics predicted from other flaviviruses. AGADT, shared by Zika Brazil, Zika  
310 Africa and dengue 4, does not fulfill the mimic criteria of BEPI probability in the proteome.  
311 QPENL, shared by Zika Brazil, Zika Africa and with dengue type 2, only does so at the lowest  
312 stringency.

313 The other flaviviruses do contain a small number of potential mimics, which could generate  
314 antibodies that target the same human proteins as Zika antibodies, but through different pentamer  
315 motifs. For the envelope protein, these are shown in Table 2. Of particular interest are the human  
316 proteins where ZIKV has a high probability mimic. Most lineages of dengue type 3 carry a  
317 predicted mimic pentamer, GEDAP, which matches a pentamer in the mature NPY peptide. This  
318 differs from ZIKV, where the conserved pentamer mimic, ESTEN, is in the CPON component of  
319 the NPY propeptide [39], as shown in Figure 6. The dengue type 3 GEDAP motif is present in  
320 134 of 277 recent (since 2000) South American dengue type 3 isolates analyzed. These subtype  
321 III isolates are from the Brazilian lineage. The remaining isolates, from the Venezuelan

322 sublineage [40] instead carry the motif GEDVP. GEDVP has no mimic matches with proteins of  
 323 neurologic function. GEDAP is conserved in all of 245 Asian dengue type 3 examined from the  
 324 same time period. The proNPY mimic peptide in ZIKV is in EDIII and is strongly associated  
 325 with predicted MHC II binding. In dengue type 3 GEDAP is located in EDIII at index position  
 326 322, a less exposed position, and adjacent peptides only have strong predicted binding affinity to  
 327 5 MHC II alleles. This implies there may be individual differences in antibody titer to this  
 328 dengue epitope.

329 Figure 6: Immunome of pre-propeptide Y showing comparative positions of dengue 3 and Zika  
 330 mimic pentamers.

331 X axis shows N>C amino acid positions. Y axis shows standard deviation units of predicted  
 332 MHC binding. Background shading shows signal peptide (white) and propeptide (yellow).  
 333 Predicted MHC-I (red line), MHC-II (blue line) binding, and probability of B cell binding (orange  
 334 lines) for each peptide, arrayed N-C, for a permuted population comprising 63 HLAs. Ribbons  
 335 (red=MHC-I, blue-MHC-II) indicate the top 25% affinity binding. Orange bars indicate high  
 336 probability B-cell binding. Arrows show predicted binding sites of antibodies from dengue 3  
 337 (GEDAP) and Zika (ESTEN).  
 338

339 Table 2: Proteins of neurologic function that are the targets of potential antibody mimicry by  
 340 elicited by the envelopes of both Zika and other flaviviruses

| UniProt ID                                                | Virus    | proteome pentamer | gi : curation |
|-----------------------------------------------------------|----------|-------------------|---------------|
| ESYT1<br>Extended synaptotagmin-1                         | WNV      | PSAPS             | 37999909      |
|                                                           | Zika AFR | SQHSG             | 592746966     |
|                                                           | Zika BR  | SQHSG             | 969945757     |
| H3BUS3<br>von Willebrand factor                           | TBEV     | KLSDT             | 6226885       |
|                                                           | Zika AFR | TENSK             | 592746966     |
|                                                           | Zika BR  | TENSK             | 969945757     |
| F5H025/ F5H1H0/ L1CAM<br>Neural cell adhesion molecule L1 | DEN1     | GNETT             | 119364637     |
|                                                           | DEN1     | GNETT             | 5117826276    |
|                                                           | JAEV     | KNPVD             | 130490        |
|                                                           | JAEV     | STTLK             | 130490        |
|                                                           | Zika AFR | PVITE             | 592746966     |
|                                                           | Zika BR  | PVITE             | 969945757     |
| NCAM1/ R4GMN9<br>Neural cell adhesion molecule 1          | DEN2     | QGEPS             | 266813        |
|                                                           | DEN2     | QGEPS             | 5117826276    |
|                                                           | Zika AFR | ATLGG             | 592746966     |
|                                                           | Zika BR  | ATLGG             | 969945757     |
| NAV2<br>Neuron navigator 2                                | DEN1     | TPQAP             | 119364637     |
|                                                           | DEN1     | TDKEK             | 119364637     |
|                                                           | DEN1     | TPQAP             | 5117826276    |
|                                                           | DEN1     | TDKEK             | 5117826276    |

|                                                   |          |       |            |
|---------------------------------------------------|----------|-------|------------|
|                                                   | Zika BR  | KGRLS | 969945757  |
| NOTC2<br>Neurogenic locus notch homolog protein 2 | DEN2     | QPENL | 266813     |
|                                                   | Zika AFR | QPENL | 592746966  |
|                                                   | Zika BR  | QPENL | 969945757  |
| NOTC3<br>Neurogenic locus notch homolog protein 3 | DEN4     | AGADT | 119390883  |
|                                                   | DEN4     | AGADT | 418715828  |
|                                                   | Zika AFR | AGADT | 592746966  |
|                                                   | Zika BR  | AGADT | 969945757  |
| NPY<br>Pro-neuropeptide Y                         | DEN3     | GEDAP | 389565793  |
|                                                   | DEN3     | GEDAP | 961377532  |
|                                                   | Zika AFR | ESTEN | 592746966  |
|                                                   | Zika BR  | ESTEN | 969945757  |
| VWA3A<br>von Willebrand factor A                  | TBEV     | KLSDT | 6226885    |
|                                                   | Zika AFR | TENSK | 592746966  |
|                                                   | Zika BR  | TENSK | 969945757  |
| VWA8<br>von Willebrand factor A                   | DEN2     | KHGKE | 266813     |
|                                                   | DEN2     | KHGKE | 5117826276 |
|                                                   | Zika AFR | GADTG | 592746966  |
|                                                   | Zika BR  | GADTG | 969945757  |

341

342 Dengue type 1 carries two potential mimic pentamers for different locations in NAV2 (Figure 7).  
 343 TPQAP is a low probability mimic due to its low BEPI score. TDKEK is in dengue type 1 EDIII  
 344 DE loop and is present in all of 146 South American and 1126 Asian dengue type 1 isolates  
 345 checked for the period 2000-2015.

346 Our analysis of dengue viruses was done with the intention of identifying mimicry similarities  
 347 and differences between dengue and ZIKV and included only a limited number of comparative  
 348 strains of dengue virus. We did not conduct an analysis to identify all potential relevant mimics  
 349 in dengue. In light of our findings, more in-depth analysis of these and other epitope mimics and  
 350 their potential role in GBS as a sequel to dengue is warranted. Nevertheless, the fact that dengue  
 351 type 3 and dengue type 1 also carry mimics on NPY and NAV2 respectively, suggests potential  
 352 for an additive or complementary role to that of ZIKV. Other predicted mimics for other human  
 353 proteins shared between ZIKV and other flaviviruses may have a combined impact. In each case  
 354 this is conditioned by BEPI probability, and by whether associated T cell help enhances antibody  
 355 titer.

356 Figure 7: Immunome of NAV2 showing comparative positions of dengue 1 and Zika mimic  
 357 pentamers.

358 Axes and coloration as for Figures 1 and 6. Arrows show predicted binding sites of antibodies  
359 from dengue 1 (TPQAP and TDKEK) and Zika Brazil (KGRLS).  
360

### 361 *Other viruses*

362 Preliminary analysis of chikungunya did not find potential neurologic protein mimics meeting  
363 our criteria in proteins E1 or E2, and one very low probability NAV2 match in the capsid,  
364 leading us to conclude that a cross-stimulation of Zika specific antibodies by this virus was  
365 unlikely. Comparative analysis performed on CMV and rubella was confined to surface and  
366 membrane proteins. This identified NAV2 matches in CMV membrane protein B and rubella E2.  
367 No NPY matches were detected.

### 368 **Discussion**

369 Immunoinformatic analysis, such as that described here, has the advantage of rapidly bringing  
370 together a large array of data and enabling pattern recognition, often unapparent at the bench or  
371 in the field. It allows the development of hypotheses which must then be tested *in vivo*. In light  
372 of the severity of the threat posed by ZIKV, and the speed at which the epidemic is apparently  
373 expanding, there is an urgent need to develop medical countermeasures [41]. We therefore opted  
374 to make these results available to the Zika community to allow them to be considered before  
375 completion of field validation. This is currently limited by the biological time inherent in  
376 production of stringent test reagents.

377 Our analysis leads to the hypothesis that antibodies to ZIKV may contribute to the pathogenesis  
378 of the clinical outcomes, and indeed may be a primary driver of GBS, microcephaly, and the  
379 ocular lesions seen in infants. This has critical implications for development of therapeutic and  
380 prophylactic interventions. An antibody mediated effect may be independent of, or compound,  
381 the impact of viral replication.

382 Generally, the occurrence of potential mimicry, as laid out here for ZIKV, is no different from  
383 any other virus; all viruses carry pentamers which generate antibodies that react to varying  
384 degrees with targets on the human proteome. Some bind to target proteins having a critical  
385 function in a critical time interval; most do not. Secondly, BEPIs found in human proteins vary  
386 somewhat between isoforms, creating a range of probabilities (Supporting Figure S1). Yet  
387 another variable is the degree to which T cell help supports the generation of high antibody titers.

388 Thus, rather than a black and white/mimic versus not mimic, we are evaluating fuzzy logic,  
389 driven by overlapping probabilities. What sets ZIKV apart is that it appears to have a particularly  
390 problematic set of possible mimics. This includes the convergence of highly conserved potential  
391 mimics in its EDIII PVITESTENSK sequence, where there is contextually adjacent robust T cell  
392 help predicted. Added to this is the pair of newer high probability motifs in EDI which appeared  
393 with the F285S mutation.

394 Neutralizing antibodies for dengue typically cross link domains or molecules and limit  
395 movements of envelope proteins [34]. However, as evidenced by epitope mapping with peptides,  
396 this does not preclude linear epitopes from generating antibodies, neutralizing or not [36]. We  
397 would expect the same to be true for ZIKV. Coupling the amino acid sequence combinatorial  
398 selection with stringent co-selection of high BEPI probability, plus physiological and clinical  
399 criteria provides a very stringent and focused molecular identification process. This identifies a  
400 relatively small set of potential targets with likely clinical relevance. Our structural analysis of  
401 the consequences of the acquired mutations in the envelope identifies that the F285S mutation  
402 changes the exposure of BEPIs, possibly also creating new conformational epitopes. The impact  
403 of these mutations on the epitopes exposed in the immature virion, or their effect on constraining  
404 envelope flexibility, have not yet been explored.

405 The proteins identified as the targets of antibodies to high probability ZIKV mimic epitopes,  
406 including proNPY, NAV2, NDF4, NT4, BDNF, and neurexins, are proteins with diverse roles in  
407 neurologic function and in embryonic development[39, 42-46]. Sorting out the possible relative  
408 disruption of these in a ZIKV infection will be a complex challenge. We will only comment  
409 briefly on those proteins corresponding to the highest probability mimics.

410 NPY has been widely studied and found in many CNS and peripheral nervous tissue  
411 locations[47]. It is present very early in embryonic development[48]. Roles for NPY have been  
412 described in maintaining retinal development and health[39]. NPY is recognized as an  
413 immunomodulator with interactions with inflammation and immune response[49, 50] and is  
414 protective against the neurovirulence of retroviral infection[51]. The role of the CPON  
415 propeptide partner, where we predict anti-Zika antibodies would bind, is poorly understood, but  
416 CPON is widely distributed and contributes to neural injury recovery[52, 53]. Whether antibody  
417 binding would compromise propeptide processing is unknown, but is feasible. In an analogous

418 situation, antibodies to the propeptide of insulin are important contributors to diabetes [54]. NPY  
419 is found in only one isoform in humans which, like insulin, may exacerbate the consequences of  
420 reduced NPY availability. Interestingly, the ESTEN motif is present in proNPY of primates, but  
421 variants occur in other species which may thus escape the effect of ZIKV mimics.

422 Optineurin, NAV2, and retinoic acid are part of the interactome necessary to retinal health and  
423 fetal CNS development [55-57]. In particular, NAV2 has been linked to fetal neurite growth and  
424 axonal extension [57]. Neural migration and extension are at a peak in the 13-21 weeks of  
425 pregnancy [58].

426 Antibodies binding to these proteins may compromise function or processing. In GBS, and other  
427 sensory deficits, the effect may be a transient impairment of neurologic function, corresponding  
428 to peak antibody titers. In a recent Zika report, a time line showed sensory impairment  
429 paralleling the antibody titer[3]. Interruption of function of one or more of the proteins identified  
430 during a critical stage of fetal development could lead to microcephaly and to the optic lesions  
431 observed following maternal ZIKV infection in pregnancy. This may be the result of placental  
432 transfer of maternal antibody, or endogenous fetal antibody, if fetal immune competence has  
433 been attained. An autoimmune response driven by antibody is not mutually exclusive with  
434 pathology arising from viral replication; both may occur.

435 Placental transfer of immunoglobulins to a fetus prior to blood brain barrier formation can be  
436 detrimental to the fetus. The human placenta facilitates the transfer of IgG, but not IgM,  
437 mediated by FcRn and increasing during the second trimester [59]. IgG1 and IgG4 are most  
438 efficiently transferred. Approximately 10% of maternal IgG is thought to pass into the fetal  
439 circulation, starting as early as week 13 [60]. The fetal blood brain barrier is not fully developed  
440 until the third trimester and may preferentially transfer proteins to the fetal brain [61, 62]. Thus,  
441 the literature suggests that the developing CNS is exposed to maternal antibodies in the first two  
442 trimesters. There is precedent for autoimmune diseases caused by the transplacental passage of  
443 antibody, including pemphigus, myasthenia gravis, and lupus [61, 63]. In dengue infection,  
444 maternal antibodies transfer to the fetus, achieving a level determined by maternal antibody titer  
445 [64]. Fetal anti-dengue titer may exceed maternal titer suggesting an active transfer process,  
446 without direct adverse effects on the fetus being reported until ADE following post-natal dengue  
447 infection [65]. A factor particularly enhancing placental transfer in the case of anti-Zika



448 antibodies to the pentamers in PVITESTENSK may be enhanced immunoglobulin class  
449 switching to IgG, due to the adjacent MHCII binding peptides and T helper stimulation.

450 One of the vexing questions in Zika epidemiology has been why the observed pathology in the  
451 New World differs from that in Africa. While ZIKV is confronting a new, immunologically  
452 naïve population, the virus has also changed. As we show here the potential “mimicome” of  
453 ZIKV has evolved with each mutation. While some pentamers, such as those in the  
454 PVITESTENSK set, are conserved across all Zika isolates, others were more recently acquired.  
455 Microcephaly has not been reported in Africa, but was reported following the Zika outbreak in  
456 French Polynesia [66]. This follows the F285S mutation and associated predicted envelope  
457 mimic addition. Whether GBS has been associated with ZIKV over the years is unclear, as it is  
458 less conspicuous than microcephaly in an endemic setting, and especially in regions also  
459 endemic for trypanosomiasis, malaria, and dengue. This begs the question of whether this is a  
460 reporting phenomenon or whether some potential mimics may be more associated with GBS  
461 (e.g. conserved NPY matches) than microcephaly. Unravelling such complex interactions will  
462 take time.

463 The observation of high probability BEPIs, predicted to elicit antibodies to even higher  
464 probability BEPIs in VWA is an interesting coincidental finding. The relevant pentamer motifs  
465 are conserved between Zika Africa and Zika Brazil. The rash associated with ZIKV occurs after  
466 peak viremia, coincident with the initial rise in antibodies. This association may be  
467 multifactorial; antibody mimicry with other clotting factors has been noted in dengue [67], as  
468 well as depletion of VWA [68]. It is unknown what the impact of micro-hemorrhagic lesions in  
469 the fetus might be, given the greater vessel fragility [62].

470 Prior exposure to dengue can result in long duration of detectable antibodies [33]. All four  
471 serotypes of dengue circulate in the Latin American region currently affected by Zika virus,  
472 fluctuating both temporally and geographically. Co-circulation of multiple lineages of the same  
473 dengue type has been noted in Colombia [69]. The 2013 outbreak of Zika infection in French  
474 Polynesia was immediately preceded by reintroduction to the islands of dengue type 1 of SE  
475 Asian origin, and dengue type 3 subtype III of South American origin, but unspecified  
476 sublineage [2, 70]. Based on our findings, interactions with dengue could occur in two ways. As  
477 generally predicted, ADE arising from the conserved region of the envelope protein and PrM

478 could exacerbate ZIKV infection. However, a further level of interaction may occur by the  
479 “doubling up” of mimics, as exemplified by NPY and NAV2, at different locations in each, by  
480 dengue 1 and dengue 3. Although there is overlap in the proteins targeted, the fact that anti-Zika  
481 antibodies arise from an epitope having strong predicted T helper support, may lead to higher  
482 titers and class switch than the antibodies from dengue epitopes with less T cell help. In this  
483 preliminary analysis we have only begun to address the potential interactions with dengue.  
484 Patterns of interaction with dengue may be particularly complex when multiple lineages co-  
485 circulate, some with and some without the NPY mimic [69]. A preliminary search of the  
486 envelope (E1, E2) and capsid proteins of chikungunya virus did not identify any strong potential  
487 mimics for the neurologically active proteins noted in ZIKV and dengue.

488 The pathology of microcephaly following Zika most closely resembles that observed in CMV  
489 and rubella infection [71]. While in both these cases virus has been isolated from the affected  
490 fetus and/or placenta, the exact pathway of pathogenesis is not understood [71, 72]. In CMV  
491 higher levels of fetal antibody were observed in infants born with sequelae of infection [73]. Our  
492 analysis of a small set of E1, E2, and capsid proteins of rubella, and the principal membrane  
493 proteins of CMV identified pentamer matches to NAV2, a finding that begs further inquiry.

494 While a causal Zika-GBS-microcephaly relationship appears increasingly, likely but awaits  
495 confirmation, the pathway laid out here provides a hypothesis for a mechanism of action and,  
496 consequently, how such a mechanism could be tested. The prospect that the pathogenesis of  
497 ZIKV may involve an antibody mediated autoimmune component must be addressed in vaccine  
498 and therapeutic development. In assessing the consequences of both vaccination and natural  
499 infection, it will be of particular importance to determine the duration of epitope-specific  
500 responses, as well as which epitope-specific responses are induced as an anamnestic response on  
501 re-exposure to the virus. Better understanding of epitope mimics may offer a specific pathway to  
502 GBS interventions, while clarification of the causal relationships of microcephaly in Zika  
503 infection may shed light on the pathogenesis of other viral teratologies.

## 504 **References**

- 505 1. Dick GW, Kitchen SF, Haddow AJ. Zika virus. I. Isolations and serological specificity.  
506 Transactions of the Royal Society of Tropical Medicine and Hygiene. 1952;46(5):509-20.  
507 PubMed PMID: 12995440.
- 508 2. Cao-Lormeau VM, Blake A, Mons S, Lastere S, Roche C, Vanhomwegen J, et al.  
509 Guillain-Barre Syndrome outbreak associated with Zika virus infection in French Polynesia: a  
510 case-control study. Lancet. 2016. doi: 10.1016/S0140-6736(16)00562-6. PubMed PMID:  
511 26948433.
- 512 3. Tappe D, Nachtigall S, Kapaun A, Schnitzler P, Gunther S, Schmidt-Chanasit J. Acute  
513 Zika virus infection after travel to Malaysian Borneo, September 2014. Emerging infectious  
514 diseases. 2015;21(5):911-3. doi: 10.3201/eid2105.141960. PubMed PMID: 25898277; PubMed  
515 Central PMCID: PMC4412240.
- 516 4. Mlakar J, Korva M, Tul N, Popovic M, Poljsak-Prijatelj M, Mraz J, et al. Zika Virus  
517 Associated with Microcephaly. The New England journal of medicine. 2016. doi:  
518 10.1056/NEJMoa1600651. PubMed PMID: 26862926.
- 519 5. Brasil P, Pereira JP, Jr., Raja Gabaglia C, Damasceno L, Wakimoto M, Ribeiro Nogueira  
520 RM, et al. Zika Virus Infection in Pregnant Women in Rio de Janeiro - Preliminary Report. The  
521 New England journal of medicine. 2016. doi: 10.1056/NEJMoa1602412. PubMed PMID:  
522 26943629.
- 523 6. de Paula Freitas B, de Oliveira Dias JR, Prazeres J, Sacramento GA, Ko AI, Maia M, et  
524 al. Ocular Findings in Infants With Microcephaly Associated With Presumed Zika Virus  
525 Congenital Infection in Salvador, Brazil. JAMA ophthalmology. 2016. doi:  
526 10.1001/jamaophthalmol.2016.0267. PubMed PMID: 26865554.
- 527 7. Ventura CV, Maia M, Bravo-Filho V, Gois AL, Belfort R, Jr. Zika virus in Brazil and  
528 macular atrophy in a child with microcephaly. Lancet. 2016. doi: 10.1016/S0140-  
529 6736(16)00006-4. PubMed PMID: 26775125.
- 530 8. Goncalves E. Acute inflammatory demyelinating polyradiculoneuropathy (Guillain-Barre  
531 syndrome) following dengue fever. Revista do Instituto de Medicina Tropical de Sao Paulo.  
532 2011;53(4):223-5. PubMed PMID: 21915467.
- 533 9. Ralapanawa DM, Kularatne SA, Jayalath WA. Guillain-Barre syndrome following  
534 dengue fever and literature review. BMC research notes. 2015;8:729. doi: 10.1186/s13104-015-  
535 1672-0. PubMed PMID: 26613722; PubMed Central PMCID: PMC4661992.
- 536 10. Oehler E, Watrin L, Larre P, Leparc-Goffart I, Lastere S, Valour F, et al. Zika virus  
537 infection complicated by Guillain-Barre syndrome--case report, French Polynesia, December  
538 2013. Euro surveillance : bulletin europeen sur les maladies transmissibles = European  
539 communicable disease bulletin. 2014;19(9). PubMed PMID: 24626205.
- 540 11. Fan P, Li X, Sun S, Su W, An D, Gao F, et al. Identification of a common epitope  
541 between enterovirus 71 and human MED25 proteins which may explain virus-associated  
542 neurological disease. Viruses. 2015;7(4):1558-77. doi: 10.3390/v7041558. PubMed PMID:  
543 25826188; PubMed Central PMCID: PMC4411665.
- 544 12. Cunha MS, Esposito DL, Rocco IM, Maeda AY, Vasami FG, Nogueira JS, et al. First  
545 Complete Genome Sequence of Zika Virus (Flaviviridae, Flavivirus) from an Autochthonous  
546 Transmission in Brazil. Genome announcements. 2016;4(2). doi: 10.1128/genomeA.00032-16.  
547 PubMed PMID: 26941134.
- 548 13. Faye O, Freire CC, Iamarino A, Faye O, de Oliveira JV, Diallo M, et al. Molecular  
549 evolution of Zika virus during its emergence in the 20(th) century. PLoS neglected tropical

- 550 diseases. 2014;8(1):e2636. doi: 10.1371/journal.pntd.0002636. PubMed PMID: 24421913;  
551 PubMed Central PMCID: PMC3888466.
- 552 14. Pickett BE, Sadat EL, Zhang Y, Noronha JM, Squires RB, Hunt V, et al. ViPR: an open  
553 bioinformatics database and analysis resource for virology research. *Nucleic acids research*.  
554 2012;40(Database issue):D593-8. doi: 10.1093/nar/gkr859. PubMed PMID: 22006842; PubMed  
555 Central PMCID: PMC3245011.
- 556 15. UniProt C. UniProt: a hub for protein information. *Nucleic acids research*.  
557 2015;43(Database issue):D204-12. doi: 10.1093/nar/gku989. PubMed PMID: 25348405;  
558 PubMed Central PMCID: PMC4384041.
- 559 16. Bremel RD, Homan EJ. An integrated approach to epitope analysis II: A system for  
560 proteomic-scale prediction of immunological characteristics. *ImmunomeRes*. 2010;6(1):8. doi:  
561 1745-7580-6-8 [pii];10.1186/1745-7580-6-8 [doi].
- 562 17. Bremel RD, Homan EJ. An integrated approach to epitope analysis I: Dimensional  
563 reduction, visualization and prediction of MHC binding using amino acid principal components  
564 and regression approaches. *Immunome research*. 2010;6:7. Epub 2010/11/04. doi: 10.1186/1745-  
565 7580-6-7. PubMed PMID: 21044289; PubMed Central PMCID: PMC2990731.
- 566 18. Wang M, Tang ST, Stryhn A, Justesen S, Larsen MV, Dziegiel MH, et al. Identification  
567 of MHC class II restricted T-cell-mediated reactivity against MHC class I binding  
568 *Mycobacterium tuberculosis* peptides. *Immunology*. 2011;132(4):482-91. doi: 10.1111/j.1365-  
569 2567.2010.03383.x [doi].
- 570 19. Greenbaum J, Sidney J, Chung J, Brander C, Peters B, Sette A. Functional classification  
571 of class II human leukocyte antigen (HLA) molecules reveals seven different supertypes and a  
572 surprising degree of repertoire sharing across supertypes. *Immunogenetics*. 2011;63(6):325-35.  
573 Epub 2011/02/10. doi: 10.1007/s00251-011-0513-0. PubMed PMID: 21305276; PubMed Central  
574 PMCID: PMC3626422.
- 575 20. Wold S, Sjorstrom M, Eriksson L. PLS-regression: a basic tool of chemometrics.  
576 *Chemometrics and Intelligent Laboratory Systems*. 2001;58:109-30.
- 577 21. Robin G, Sato Y, Desplancq D, Rochel N, Weiss E, Martineau P. Restricted diversity of  
578 antigen binding residues of antibodies revealed by computational alanine scanning of 227  
579 antibody-antigen complexes. *J Mol Biol*. 2014;426(22):3729-43. doi:  
580 10.1016/j.jmb.2014.08.013. PubMed PMID: 25174334.
- 581 22. Homan EJ, Bremel RD. Patterns of Predicted T-Cell Epitopes Associated with Antigenic  
582 Drift in Influenza H3N2 Hemagglutinin. *PLoSOne*. 2011;6(10):e26711. doi:  
583 10.1371/journal.pone.0026711 [doi];PONE-D-11-07616 [pii].
- 584 23. Larsen JE, Lund O, Nielsen M. Improved method for predicting linear B-cell epitopes.  
585 *ImmunomeRes*. 2006;2:2.
- 586 24. Lavinder JJ, Wine Y, Giesecke C, Ippolito GC, Horton AP, Lungu OI, et al.  
587 Identification and characterization of the constituent human serum antibodies elicited by  
588 vaccination. *Proc Natl Acad Sci U S A*. 2014;111(6):2259-64. doi: 10.1073/pnas.1317793111.  
589 PubMed PMID: 24469811; PubMed Central PMCID: PMC3926051.
- 590 25. Zhang Y. I-TASSER server for protein 3D structure prediction. *BMC Bioinformatics*.  
591 2008;9:40. doi: 10.1186/1471-2105-9-40. PubMed PMID: 18215316; PubMed Central PMCID:  
592 PMC2245901.
- 593 26. Yang J, Yan R, Roy A, Xu D, Poisson J, Zhang Y. The I-TASSER Suite: protein  
594 structure and function prediction. *Nature methods*. 2015;12(1):7-8. doi: 10.1038/nmeth.3213.  
595 PubMed PMID: 25549265; PubMed Central PMCID: PMC4428668.

- 596 27. Roy A, Kucukural A, Zhang Y. I-TASSER: a unified platform for automated protein  
597 structure and function prediction. *Nature protocols*. 2010;5(4):725-38. doi:  
598 10.1038/nprot.2010.5. PubMed PMID: 20360767; PubMed Central PMCID: PMC2849174.
- 599 28. Zhang Y, Skolnick J. Scoring function for automated assessment of protein structure  
600 template quality. *Proteins*. 2004;57(4):702-10. doi: 10.1002/prot.20264. PubMed PMID:  
601 15476259.
- 602 29. Xu J, Zhang Y. How significant is a protein structure similarity with TM-score = 0.5?  
603 *Bioinformatics*. 2010;26(7):889-95. doi: 10.1093/bioinformatics/btq066. PubMed PMID:  
604 20164152; PubMed Central PMCID: PMC2913670.
- 605 30. Zhang Y. Protein structure prediction: when is it useful? *Current opinion in structural  
606 biology*. 2009;19(2):145-55. doi: 10.1016/j.sbi.2009.02.005. PubMed PMID: 19327982; PubMed  
607 Central PMCID: PMC2673339.
- 608 31. Zhang Y, Skolnick J. TM-align: a protein structure alignment algorithm based on the  
609 TM-score. *Nucleic acids research*. 2005;33(7):2302-9. doi: 10.1093/nar/gki524. PubMed PMID:  
610 15849316; PubMed Central PMCID: PMC1084323.
- 611 32. Xu D, Zhang Y. Generating triangulated macromolecular surfaces by Euclidean Distance  
612 Transform. *PloS one*. 2009;4(12):e8140. doi: 10.1371/journal.pone.0008140. PubMed PMID:  
613 19956577; PubMed Central PMCID: PMC2779860.
- 614 33. Wahala WM, Silva AM. The human antibody response to dengue virus infection.  
615 *Viruses*. 2011;3(12):2374-95. doi: 10.3390/v3122374. PubMed PMID: 22355444; PubMed  
616 Central PMCID: PMC3280510.
- 617 34. Flipse J, Smit JM. The Complexity of a Dengue Vaccine: A Review of the Human  
618 Antibody Response. *PLoS neglected tropical diseases*. 2015;9(6):e0003749. doi:  
619 10.1371/journal.pntd.0003749. PubMed PMID: 26065421; PubMed Central PMCID:  
620 PMC4465930.
- 621 35. Roehrig JT, Bolin RA, Kelly RG. Monoclonal antibody mapping of the envelope  
622 glycoprotein of the dengue 2 virus, Jamaica. *Virology*. 1998;246(2):317-28. doi:  
623 10.1006/viro.1998.9200. PubMed PMID: 9657950.
- 624 36. Midgley CM, Flanagan A, Tran HB, Dejnirattisai W, Chawansuntati K, Jumnainsong A,  
625 et al. Structural analysis of a dengue cross-reactive antibody complexed with envelope domain  
626 III reveals the molecular basis of cross-reactivity. *J Immunol*. 2012;188(10):4971-9. doi:  
627 10.4049/jimmunol.1200227. PubMed PMID: 22491255; PubMed Central PMCID:  
628 PMC3364712.
- 629 37. Lai CY, Tsai WY, Lin SR, Kao CL, Hu HP, King CC, et al. Antibodies to envelope  
630 glycoprotein of dengue virus during the natural course of infection are predominantly cross-  
631 reactive and recognize epitopes containing highly conserved residues at the fusion loop of  
632 domain II. *J Virol*. 2008;82(13):6631-43. doi: JVI.00316-08 [pii];10.1128/JVI.00316-08 [doi].
- 633 38. Weiss S, Bogen B. B-lymphoma cells process and present their endogenous  
634 immunoglobulin to major histocompatibility complex-restricted T cells. *Proc Natl Acad Sci U S  
635 A*. 1989;86(1):282-6. Epub 1989/01/01. PubMed PMID: 2492101; PubMed Central PMCID:  
636 PMC286448.
- 637 39. Santos-Carvalho A, Ambrosio AF, Cavadas C. Neuropeptide Y system in the retina:  
638 From localization to function. *Progress in retinal and eye research*. 2015;47:19-37. doi:  
639 10.1016/j.preteyeres.2015.03.001. PubMed PMID: 25797468.
- 640 40. Araujo JM, Nogueira RM, Schatzmayr HG, Zanotto PM, Bello G. Phylogeography and  
641 evolutionary history of dengue virus type 3. *Infection, genetics and evolution : journal of*

- 642 molecular epidemiology and evolutionary genetics in infectious diseases. 2009;9(4):716-25. doi:  
643 10.1016/j.meegid.2008.10.005. PubMed PMID: 19010450.
- 644 41. Malone RW, Homan J, Callahan MV, Glasspool-Malone J, Damodaran L, Schneider Ade  
645 B, et al. Zika Virus: Medical Countermeasure Development Challenges. PLoS neglected tropical  
646 diseases. 2016;10(3):e0004530. doi: 10.1371/journal.pntd.0004530. PubMed PMID: 26934531.
- 647 42. Missler M, Sudhof TC. Neurexophilins form a conserved family of neuropeptide-like  
648 glycoproteins. The Journal of neuroscience : the official journal of the Society for Neuroscience.  
649 1998;18(10):3630-8. PubMed PMID: 9570794.
- 650 43. Reissner C, Runkel F, Missler M. Neurexins. Genome biology. 2013;14(9):213. doi:  
651 10.1186/gb-2013-14-9-213. PubMed PMID: 24083347; PubMed Central PMCID: PMC4056431.
- 652 44. Clagett-Dame M, McNeill EM, Muley PD. Role of all-trans retinoic acid in neurite  
653 outgrowth and axonal elongation. Journal of neurobiology. 2006;66(7):739-56. doi:  
654 10.1002/neu.20241. PubMed PMID: 16688769.
- 655 45. McNeill EM, Klockner-Bormann M, Roesler EC, Talton LE, Moechars D, Clagett-Dame  
656 M. Nav2 hypomorphic mutant mice are ataxic and exhibit abnormalities in cerebellar  
657 development. Developmental biology. 2011;353(2):331-43. doi: 10.1016/j.ydbio.2011.03.008.  
658 PubMed PMID: 21419114; PubMed Central PMCID: PMC3250223.
- 659 46. Conover JC, Yancopoulos GD. Neurotrophin regulation of the developing nervous  
660 system: analyses of knockout mice. Reviews in the neurosciences. 1997;8(1):13-27. PubMed  
661 PMID: 9402642.
- 662 47. Polak JM, Bloom SR. Regulatory peptides--the distribution of two newly discovered  
663 peptides: PHI and NPY. Peptides. 1984;5 Suppl 1:79-89. PubMed PMID: 6384956.
- 664 48. Allen JM, McGregor GP, Woodhams PL, Polak JM, Bloom SR. Ontogeny of a novel  
665 peptide, neuropeptide Y (NPY) in rat brain. Brain research. 1984;303(1):197-200. PubMed  
666 PMID: 6547364.
- 667 49. Chandrasekharan B, Nezami BG, Srinivasan S. Emerging neuropeptide targets in  
668 inflammation: NPY and VIP. American journal of physiology Gastrointestinal and liver  
669 physiology. 2013;304(11):G949-57. doi: 10.1152/ajpgi.00493.2012. PubMed PMID: 23538492;  
670 PubMed Central PMCID: PMC3680683.
- 671 50. Phan TA, Taylor AW. The neuropeptides alpha-MSH and NPY modulate phagocytosis  
672 and phagolysosome activation in RAW 264.7 cells. Journal of neuroimmunology. 2013;260(1-  
673 2):9-16. doi: 10.1016/j.jneuroim.2013.04.019. PubMed PMID: 23689030; PubMed Central  
674 PMCID: PMC3679250.
- 675 51. Du M, Butchi NB, Woods T, Morgan TW, Peterson KE. Neuropeptide Y has a protective  
676 role during murine retrovirus-induced neurological disease. Journal of virology.  
677 2010;84(21):11076-88. doi: 10.1128/JVI.01022-10. PubMed PMID: 20702619; PubMed Central  
678 PMCID: PMC2953205.
- 679 52. Allen JM, Polak JM, Bloom SR. Presence of the predicted C-flanking peptide of  
680 neuropeptide Y (CPON) in tissue extracts. Neuropeptides. 1985;6(2):95-100. PubMed PMID:  
681 3839058.
- 682 53. Ramieri G, Stella M, Calcagni M, Cellino G, Panzica GC. An immunohistochemical  
683 study on cutaneous sensory receptors after chronic median nerve compression in man. Acta Anat  
684 (Basel). 1995;152(3):224-9. PubMed PMID: 7572032.
- 685 54. Yu L, Dong F, Miao D, Fouts AR, Wenzlau JM, Steck AK. Proinsulin/Insulin  
686 autoantibodies measured with electrochemiluminescent assay are the earliest indicator of

- 687 prediabetic islet autoimmunity. *Diabetes care*. 2013;36(8):2266-70. doi: 10.2337/dc12-2245.  
688 PubMed PMID: 23423694; PubMed Central PMCID: PMC3714529.
- 689 55. Luo T, Sakai Y, Wagner E, Drager UC. Retinoids, eye development, and maturation of  
690 visual function. *Journal of neurobiology*. 2006;66(7):677-86. doi: 10.1002/neu.20239. PubMed  
691 PMID: 16688765.
- 692 56. Ying H, Yue BY. Cellular and molecular biology of optineurin. *International review of*  
693 *cell and molecular biology*. 2012;294:223-58. doi: 10.1016/B978-0-12-394305-7.00005-7.  
694 PubMed PMID: 22364875; PubMed Central PMCID: PMC3673586.
- 695 57. Muley PD, McNeill EM, Marzinke MA, Knobel KM, Barr MM, Clagett-Dame M. The  
696 atRA-responsive gene neuron navigator 2 functions in neurite outgrowth and axonal elongation.  
697 *Developmental neurobiology*. 2008;68(13):1441-53. doi: 10.1002/dneu.20670. PubMed PMID:  
698 18726912; PubMed Central PMCID: PMC4409142.
- 699 58. de Graaf-Peters VB, Hadders-Algra M. Ontogeny of the human central nervous system:  
700 what is happening when? *Early human development*. 2006;82(4):257-66. doi:  
701 10.1016/j.earlhumdev.2005.10.013. PubMed PMID: 16360292.
- 702 59. Kuo TT, Baker K, Yoshida M, Qiao SW, Aveson VG, Lencer WI, et al. Neonatal Fc  
703 receptor: from immunity to therapeutics. *Journal of clinical immunology*. 2010;30(6):777-89.  
704 doi: 10.1007/s10875-010-9468-4. PubMed PMID: 20886282; PubMed Central PMCID:  
705 PMC2970823.
- 706 60. Kowal C, Athanassiou A, Chen H, Diamond B. Maternal antibodies and developing  
707 blood-brain barrier. *Immunologic research*. 2015;63(1-3):18-25. doi: 10.1007/s12026-015-8714-  
708 5. PubMed PMID: 26507553.
- 709 61. Diamond B, Huerta PT, Mina-Osorio P, Kowal C, Volpe BT. Losing your nerves? Maybe  
710 it's the antibodies. *Nature reviews Immunology*. 2009;9(6):449-56. doi: 10.1038/nri2529.  
711 PubMed PMID: 19424277; PubMed Central PMCID: PMC2783680.
- 712 62. Saunders NR, Liddel SA, Dziegielewska KM. Barrier mechanisms in the developing  
713 brain. *Frontiers in pharmacology*. 2012;3:46. doi: 10.3389/fphar.2012.00046. PubMed PMID:  
714 22479246; PubMed Central PMCID: PMC3314990.
- 715 63. Fox-Edmiston E, Van de Water J. Maternal Anti-Fetal Brain IgG Autoantibodies and  
716 Autism Spectrum Disorder: Current Knowledge and its Implications for Potential Therapeutics.  
717 *CNS drugs*. 2015;29(9):715-24. doi: 10.1007/s40263-015-0279-2. PubMed PMID: 26369920;  
718 PubMed Central PMCID: PMC4605883.
- 719 64. Perret C, Chanthavanich P, Pengsaa K, Limkittikul K, Hutajaroen P, Bunn JE, et al.  
720 Dengue infection during pregnancy and transplacental antibody transfer in Thai mothers. *The*  
721 *Journal of infection*. 2005;51(4):287-93. doi: 10.1016/j.jinf.2004.10.003. PubMed PMID:  
722 16291281.
- 723 65. Leite RC, Souza AI, Castanha PM, Cordeiro MT, Martelli CT, Ferreira AL, et al. Dengue  
724 infection in pregnancy and transplacental transfer of anti-dengue antibodies in Northeast, Brazil.  
725 *Journal of clinical virology : the official publication of the Pan American Society for Clinical*  
726 *Virology*. 2014;60(1):16-21. doi: 10.1016/j.jcv.2014.02.009. PubMed PMID: 24657101.
- 727 66. Cao-Lormeau VM, Roche C, Teissier A, Robin E, Berry AL, Mallet HP, et al. Zika virus,  
728 French polynesia, South pacific, 2013. *Emerging infectious diseases*. 2014;20(6):1085-6. doi:  
729 10.3201/eid2006.140138. PubMed PMID: 24856001; PubMed Central PMCID: PMC4036769.
- 730 67. Chuang YC, Lin YS, Liu HS, Yeh TM. Molecular mimicry between dengue virus and  
731 coagulation factors induces antibodies to inhibit thrombin activity and enhance fibrinolysis.

- 732 Journal of virology. 2014;88(23):13759-68. doi: 10.1128/JVI.02166-14. PubMed PMID:  
733 25231318; PubMed Central PMCID: PMC4248957.
- 734 68. Djamiatun K, van der Ven AJ, de Groot PG, Faradz SM, Hapsari D, Dolmans WM, et al.  
735 Severe dengue is associated with consumption of von Willebrand factor and its cleaving enzyme  
736 ADAMTS-13. PLoS neglected tropical diseases. 2012;6(5):e1628. doi:  
737 10.1371/journal.pntd.0001628. PubMed PMID: 22563509; PubMed Central PMCID:  
738 PMC3341341.
- 739 69. Ospina MC, Diaz FJ, Osorio JE. Prolonged co-circulation of two distinct Dengue virus  
740 Type 3 lineages in the hyperendemic area of Medellin, Colombia. The American journal of  
741 tropical medicine and hygiene. 2010;83(3):672-8. doi: 10.4269/ajtmh.2010.09-0766. PubMed  
742 PMID: 20810837; PubMed Central PMCID: PMC2929068.
- 743 70. Cao-Lormeau VR, C.; Musso, D.; Mallet, HP.; Dalipanda, T.; Dofai, A.; Nogareda, F.;  
744 Nilles, EJ.; Aaskov, J. . Dengue Virus Type 3, South Pacific Islands, 2013. Emerging infectious  
745 diseases. 2014;20(6).
- 746 71. Cheeran MC, Lokensgard JR, Schleiss MR. Neuropathogenesis of congenital  
747 cytomegalovirus infection: disease mechanisms and prospects for intervention. Clinical  
748 microbiology reviews. 2009;22(1):99-126, Table of Contents. doi: 10.1128/CMR.00023-08.  
749 PubMed PMID: 19136436; PubMed Central PMCID: PMC2620634.
- 750 72. Webster WS. Teratogen update: congenital rubella. Teratology. 1998;58(1):13-23. doi:  
751 10.1002/(SICI)1096-9926(199807)58:1<13::AID-TERA5>3.0.CO;2-2. PubMed PMID:  
752 9699240.
- 753 73. Boppana SB, Miller J, Britt WJ. Transplacentally acquired antiviral antibodies and  
754 outcome in congenital human cytomegalovirus infection. Viral immunology. 1996;9(4):211-8.  
755 PubMed PMID: 8978017.

756

757

758

759



760 **Acknowledgements:**

761 No external funding sources supported this study.

762 The authors gratefully acknowledge the comments and review of Drs. Michael Imboden,  
763 Stefanie Hone, Guy Plunkett III, Gary Splitter, and Thomas Yuill, and discussions with Drs.  
764 Adriano Schneider and Daniel Janies. Dr. Jill Glasspool Malone and Alleen Hager assisted with  
765 data compilation and literature assembly.

766

767

768

769 **Supporting Information**

770 Figure S1: Correlation between the B cell epitope predictions for pentamers in the proteome  
771 corresponding to the identical pentamer in the Zika virus

772 Table S1: Viruses analyzed

773 Table S2: Keywords

774 Table S3: Predicted epitope mimics in all proteins of Zika Brazil

775

776

777

Figure 1

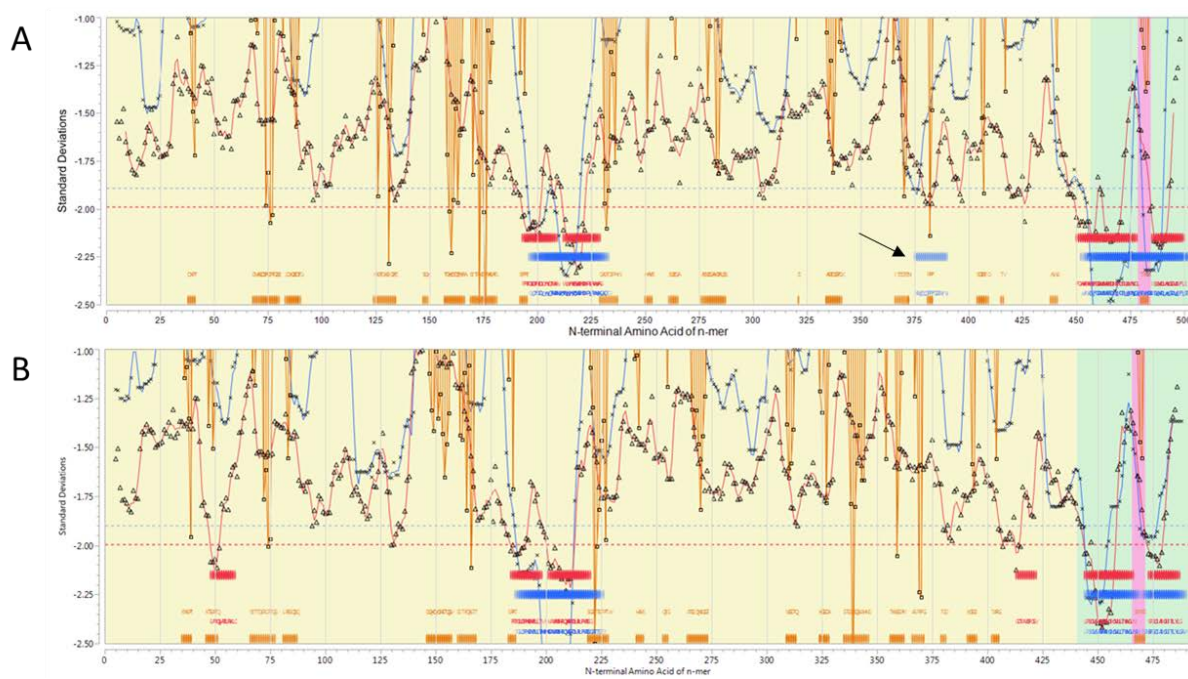

Figure 2

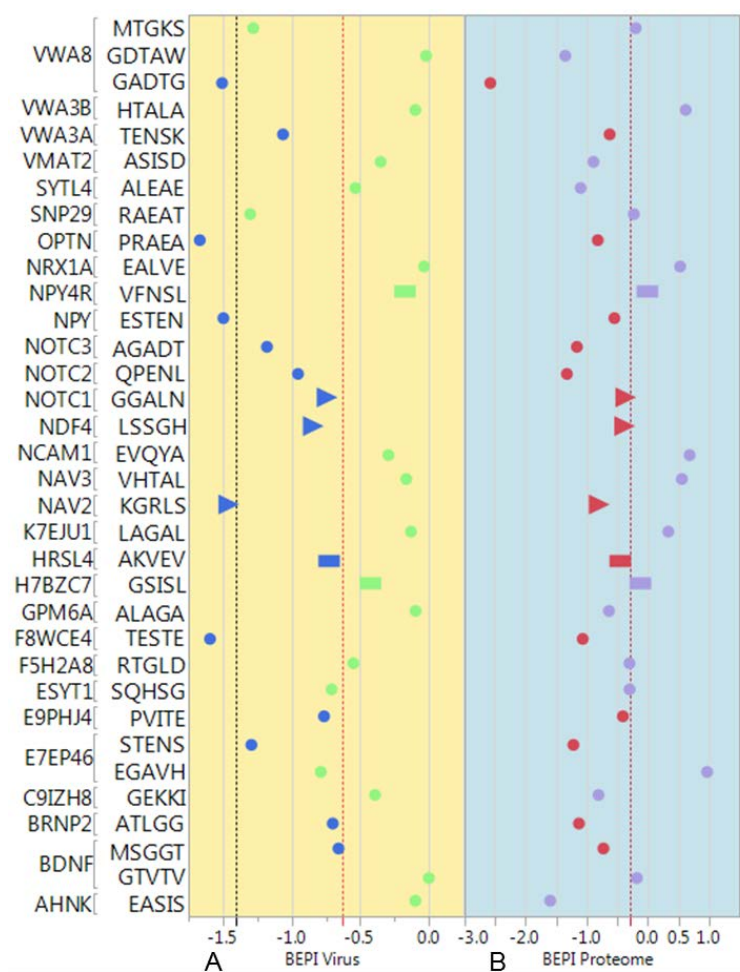

Figure 3

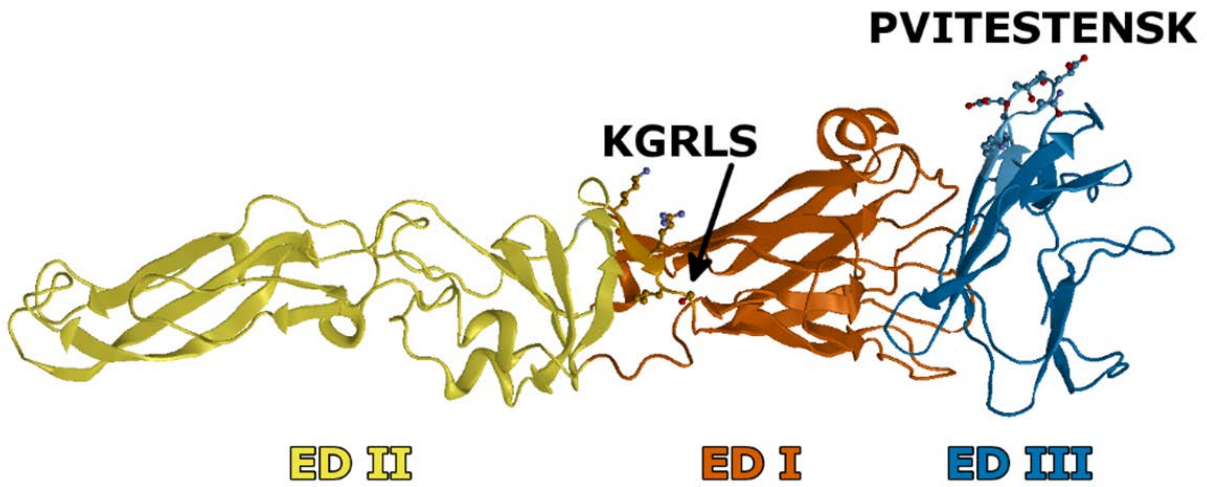

Figure 4

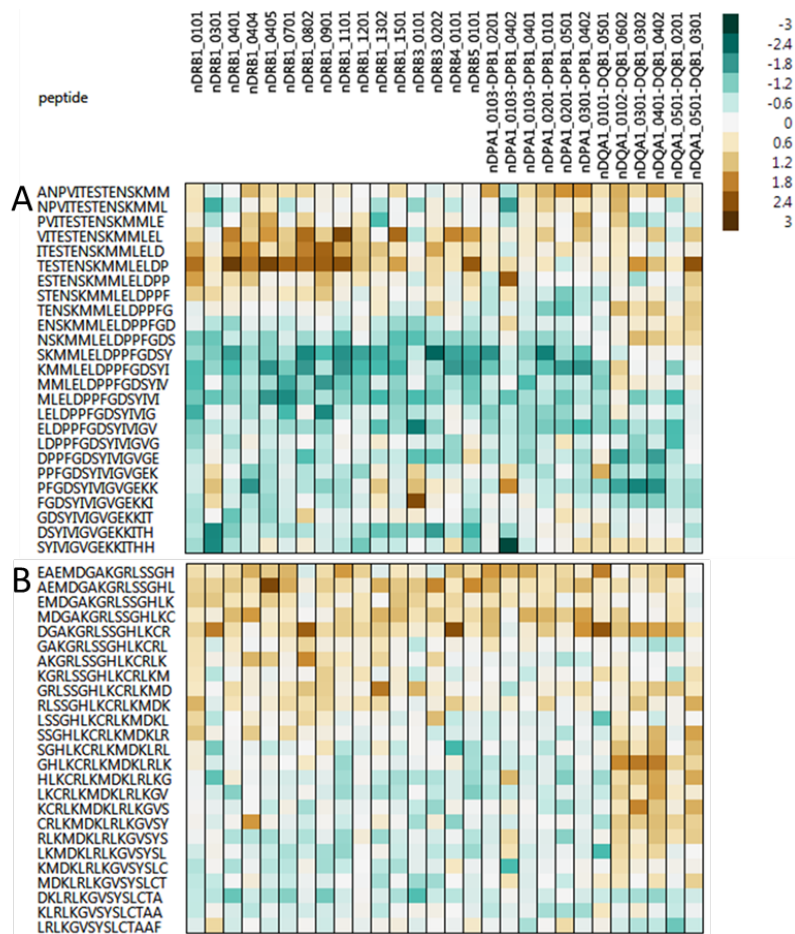

Figure 5

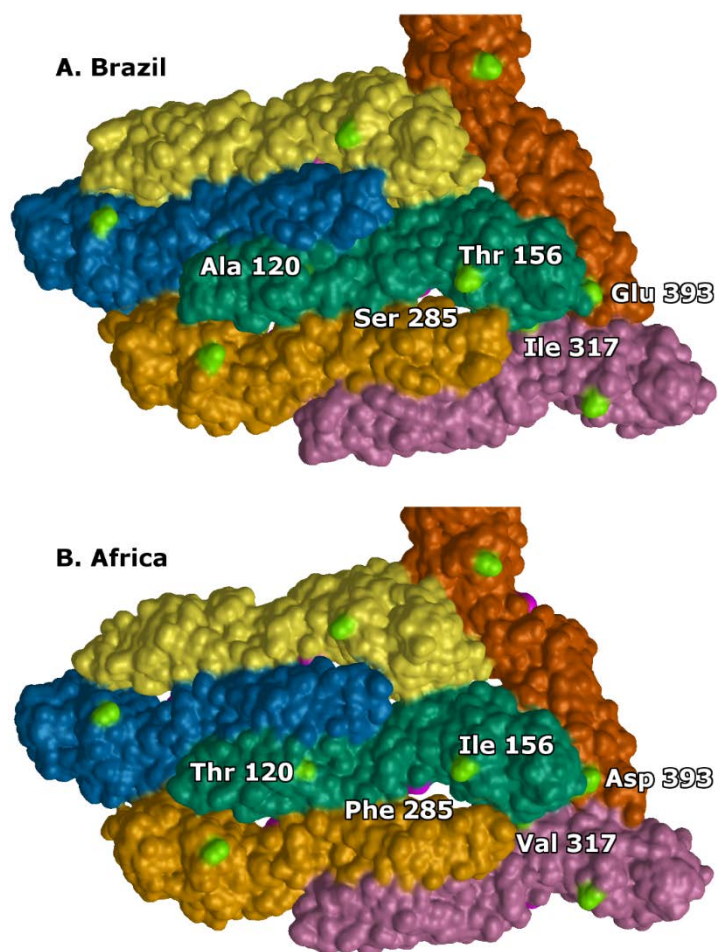

Figure 6

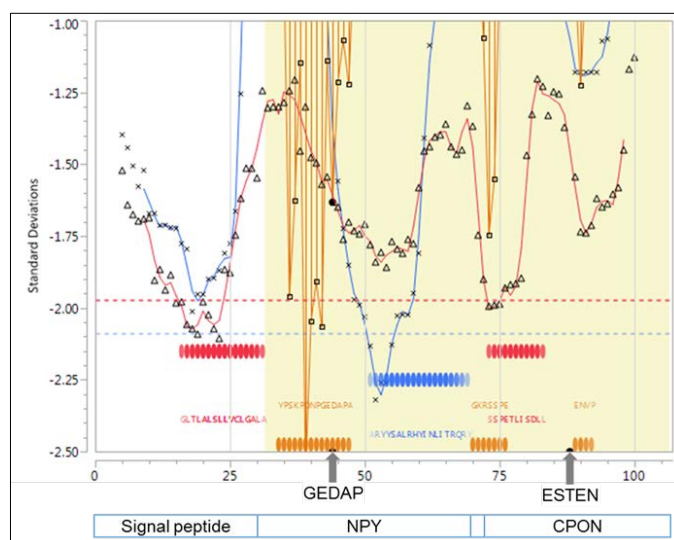

Figure 7

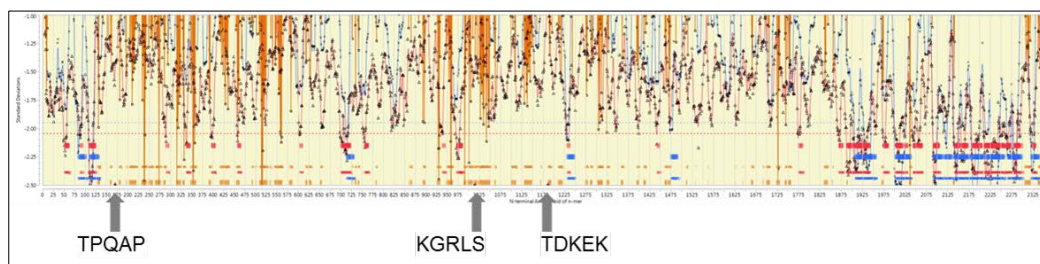

Source: https://www.biorxiv.org/content/10.1101/044834v1.full.pdf
